# Supplementary material for: Secretion of Protective Antigens by Tissue-Stage Nematode Larvae Revealed by Proteomic Analysis and Vaccination-Induced Sterile Immunity
Source: PLoS Pathog. 2013 Aug 15;9(8):e1003492. doi: 10.1371/journal.ppat.1003492 (PMC3744408; doi:10.1371/journal.ppat.1003492)
Supplement: Table S3 — Full A-Z list of proteins identified in ERM. As above for ERM. (XLSX) [file ppat.1003492.s009.xlsx]

## Sheet: Table S3 = full ERM A-Z
Protein	Isotig	ERM emPAI rank	spectral count	peptides	SS?	emPAI_L4ES	emPAI_HES	emPAI_EggES	L3 RPKM	Day3 RPKM	Day5 RPKM	Adult RPKM	Eggs RPKM
3-hydroxyacyl-CoA dehydrogenase type II	Hp_I17168_IG09112_L939	69	4	4	NO	0	0	0.46	0	0	0	4.88	0
ACE-1	Hp_I12803_IG04747_L2174	148	3	2	YES	1.4	1.57	0.13	1.85	2.22	7.87	5.79	0.89
ACE-2	Hp_I04629_IG00719_L1853	shared iso	n/a	n/a	YES	0.76	1.04	0	0	2.87	5.84	4.27	0
ACE-3	Hp_I04627_IG00719_L1926	192	1	1	YES	0.64	1.07	0.05	0	3.83	5.25	4.45	0
Acid phosphatase	Hp_I04070_IG00550_L1810	190	1	1	NO	0	0.05	0.05	4.13	2.39	0.89	3.48	1.79
Actin depolymerising factor	Hp_I09037_IG02603_L1188	129	2	2	NO	0	0.15	0.16	2.6	4.73	5.33	5.21	4
adenosylhomocysteinase	Hp_I07662_IG01915_L1761	165	2	2	NO	0	0	0.1	2.28	2.52	3.43	3.1	3.81
Aldolase	Hp_I07682_IG01925_L1479	52	10	8	YES	0.43	0.58	0.62	7.4	7.15	9.25	8.88	6.14
Aldolase	Hp_I14477_IG06421_L1364	141	2	2	NO	0	0.13	0.14	5.24	2.47	2.69	5.08	0.36
Annexin	Hp_I15761_IG07705_L1121	172	1	1	NO	0	2.17	0.08	3.65	5.1	5.37	5.08	2.66
APY-1.1	Hp_I15979_IG07923_L1089	123	2	2	YES	0	4.96	0.18	0	0	0	5.07	0
APY-1.2	Hp_I04667_IG00729_L1917	124	1	1	YES	0	1.8	0.18	1.78	0	0.7	3.5	1.41
APY-1.3	Hp_I15931_IG07875_L1098	125	2	2	YES	0	4.48	0.18	0	0	0.75	6.01	0
APY-2	Hpb-APY-2	175	1	1	YES	0	2.18	0.08	0	2.52	3.86	6.95	0.27
Arginine kinase	Hp_I15720_IG07664_L1128	10	17	10	NO	0	0.33	1.67	0	0	0	5.6	0.38
Aspartyl protease (necepsin)	Hp_I14323_IG06267_L1413	187	1	1	YES	0.06	0	0.06	0	5.7	8.69	10.44	0
Beta-ureidopropionase	Hp_I15696_IG07640_L1135	130	2	2	NO	0	0	0.16	0	3.36	2.5	3.44	2.91
Branched-chain amino acid aminotransferase	Hp_I13943_IG05887_L1519	152	2	2	NO	0	0	0.12	1.8	2.59	0.72	5.54	0.28
C-type lectin	Hp_C00269_IG00001_L1007	54	2	1	YES	0	0	0.61	0	0	0	10.14	6.24
C-type lectin	Hp_I10590_IG03379_L588	86	2	2	YES	0	0	0.32	0	0	0	4.9	0.38
C-type lectin	Hp_I09575_IG02872_L1199	136	2	2	YES	0	0	0.15	3.04	0	0.74	4.24	4.69
C-type lectin mannose receptor-like	Hp_I15536_IG07480_L1158	31	13	7	YES	0	0.72	0.91	1.84	0	0	5.62	0
C-type lectin mannose receptor-like	Hp_I22655_IG14599_L627	65	3	3	YES*	0	0	0.49	0	0	0	6.26	0
calmodulin-binding motif domain protein	Hp_I26723_IG18667_L526	32	10	3	YES	0	0.17	0.91	0	0	0	6.4	0
calmodulin-binding motif domain protein	Hp_I28724_IG20668_L494	48	3	2	YES	0	0	0.65	0	0	0	5.98	0.4
calmodulin-binding motif domain protein	Hp_I29012_IG20956_L489	77	3	2	YES	0	0	0.41	0	0	0	7.14	0
Calreticulin	Hpb-CRT	142	3	2	YES	0.31	0.07	0.14	5.95	6.9	7.28	6.01	7.44
Catalase	Hp_I13437_IG05381_L1722	44	14	10	NO	0	0	0.71	4.99	2.71	2.71	4.7	4.32
Cathepsin B-like cysteine protease	Hp_I14314_IG06258_L1412	188	1	1	YES	0.06	0.06	0.06	5.91	8.2	8.71	9.5	3.53
Chondroitin family member	Hp_I04266_IG00599_L823	34	10	6	YES	0	0	0.88	0	0	0	9.11	5.89
Chondroitin family member	Hp_I14119_IG06063_L1461	55	11	7	YES*	0	0.4	0.61	0	0	0	7.66	4.77
Chondroitin family member	Hp_I05472_IG00957_L1361	92	9	3	YES	0	0.45	0.3	0	0	0	10.03	3.88
Chondroitin family member	Hp_I17130_IG09074_L942	116	2	2	YES	0	0.09	0.21	0	0	0	8.89	0
Chondroitin family member	Hp_I20654_IG12598_L702	149	1	1	YES	0	0.12	0.13	0	0	0	7.39	4.3
Cold shock protein	Hp_I14103_IG06047_L1467	185	1	1	NO	0	0	0.06	5.74	4.98	5.41	9.8	4.67
CSP-02	Hp_I17532_IG09476_L903	167	1	1	YES	0	0.56	0.1	0	0	0.77	9.31	0.42
CSP-08	FL8UM6J01B7CV6	21	4	2	YES*	0	1.83	1.06	0	0	0	2.5	0
CSP-21	Hp_I18812_IG10756_L802	155	1	1	YES	0	0.11	0.12	3.92	8.8	7.17	8.18	2.95
Cyclophilin	Hp_I19989_IG11933_L735	7	14	6	NO	1.92	0.76	1.92	5.7	2.45	6.94	5.64	3.24
Cyclophilin	Hp_I17340_IG09284_L922	53	6	5	YES	0.79	0.32	0.62	5.62	5.44	6.9	3.81	6.2
Cystatin	Hp_I02126_IG00179_L738	156	1	1	YES	0.25	0.38	0.12	5.12	4.07	4.98	4.31	6.94
Cytochrome C	Hp_I02604_IG00247_L647	96	2	2	NO	0.14	0.13	0.29	5.86	3.02	4.96	2.77	4.76
Deoxyribonuclease II family member	Hp_I15874_IG07818_L1106	176	1	1	YES	1.16	1.23	0.08	2.31	3.6	3.87	4.53	0.39
Dihydrolipoyl dehydrogenase	Hp_I03499_IG00413_L1865	134	3	3	NO	0	0	0.15	4.61	3.69	4.41	4.51	4.83
DOMON domain containing protein	Hp_I21746_IG13690_L653	143	1	1	YES	0	0.13	0.14	3.13	3.99	3.18	4.21	4.04
DOMON domain containing protein	Hp_I18272_IG10216_L841	162	1	1	YES	0	0	0.11	0	0	0.92	4.31	0
DUF148 / Ov39 homolog	Hp_I01697_IG00127_L848	113	3	2	YES	0.22	0	0.22	0	5.36	6.03	3.14	6.61
enolase	Hp_I06748_IG01436_L1580	3	39	19	NO	0.32	1.74	2.83	6.52	4.27	5.64	3.31	3.83
ERN-01	Hp_I30098_IG22042_L475	73	2	2	NO	0	0	0.43	0	0	0	6.6	0
ERN-02	Hp_I19471_IG11415_L755	104	2	2	NO	0	0	0.26	0	0	0	3.24	0
ERN-03	Hp_I27940_IG19884_L505	79	3	1	NO	0	0	0.37	0	0	0	4.11	0
ERN-04	Hp_I43096_IG35040_L339	100	1	1	NO	0	0	0.27	0	0	0	2.74	0
ERN-05	Hp_I34113_IG26057_L428	108	1	1	NO	0	0	0.23	0	0	0	4.2	0
ERN-06	Hp_I45120_IG37064_L323	90	1	1	NO	0	0	0.3	0	0	0	0	3.9
ERP-01	Hp_I30636_IG22580_L471	8	9	3	YES	0	0	1.84	0	0	0	5.05	0
ERP-02	Hp_I03369_IG00388_L681	101	4	2	YES	0	0	0.27	0	2.47	2.5	4.45	0.86
ERP-03	Hp_I25677_IG17621_L546	36	4	4	YES	0	0	0.85	2.32	0	0	6.39	0
ERP-04	Hp_I34379_IG26323_L431	66	3	2	YES	0	0	0.48	0	0	0	4.9	0
ERP-05	Hp_I13743_IG05687_L1584	119	3	3	YES	0	0	0.19	0	0	0	5.94	4.63
ERP-06	Hp_I38111_IG30055_L394	37	4	3	YES	0	0	0.85	0	0	0	6.41	0
ERP-07	Hp_I23836_IG15780_L590	61	4	2	YES	0	0	0.52	0	0	0	5.48	2.42
ERP-08	Hp_I34892_IG26836_L422	40	5	2	YES	0	0	0.81	0	0	0	5.59	0
ERP-09	Hp_I15588_IG07532_L1149	177	1	1	YES	0	0	0.08	0	0	0	5.1	0
ERP-10	Hp_I21830_IG13774_L655	93	2	2	YES	0	0	0.3	0	0	0	5.4	0
ERP-11	Hp_I25622_IG17566_L549	132	2	1	YES	0	0	0.16	0	0	0	5.27	0
ERP-12	Hp_I17809_IG09753_L879	168	1	1	YES	0	0	0.1	1.89	0	0.77	7.41	0.33
ERP-13	Hp_I29394_IG21338_L484	120	1	1	YES	0	0	0.19	0	0	0	5.47	0
ERP-14	Hp_I45923_IG37867_L314	97	2	1	YES	0	0	0.29	0	0	0	4.81	0
ERP-15	Hp_I11144_IG03656_L469	121	1	1	YES	0	0	0.19	0	0	0	3.87	0
ERP-16	Hp_I43395_IG35339_L341	98	1	1	YES	0	0	0.29	0	0	0	7.02	0
ERP-17	Hp_I21734_IG13678_L657	144	1	1	YES	0	0	0.14	0	0	0	5.55	0
ERP-18	Hp_I43851_IG35795_L337	102	1	1	YES	0	0	0.27	0	0	0	3.97	0
Eukaryotic translation elongation factor 1A	Hp_I01926_IG00152_L2229	81	1	1	NO	0	0.8	0.36	2.66	6.96	8.75	4.19	5.25
fumarase	Hp_I06697_IG01410_L1724	109	4	4	NO	0	0.05	0.23	4.89	4.72	6.49	4.35	3.83
Galectin	Hp_I17563_IG09507_L902	1	25	14	NO	0	0.2	4	0	0	0	4.14	0
Glutathione S-transferase	Hp_I09610_IG02889_L771	157	1	1	NO	0.24	0.36	0.11	0	0	4.98	4.09	4.33
glyceraldehyde-3-phosphate dehydrogenase	Hp_I06838_IG01481_L1319	179	1	1	NO	0	0	0.07	6.35	5.26	6.59	8.12	3.13
Glycine cleavage system H protein	Hp_I19258_IG11202_L774	153	1	1	NO	0	0	0.12	4.83	3.24	3.89	3.88	4.64
GST-2	Hp_I19625_IG11569_L752	16	10	7	NO	0	0.84	1.18	3.28	3.81	5.14	5.4	4.41
guanine nucleotide exchange factor MSS4-like	Hp_I07136_IG01634_L614	91	2	2	NO	0	0	0.3	0	0	0	5.34	0
Hexokinase	Hp_I13426_IG05370_L1731	39	15	12	NO	0	0.53	0.82	0	0	0	6.37	0.33
Histone	Hp_I03865_IG00501_L670	105	1	1	NO	0	0.25	0.26	3.42	3.95	6.89	4.97	6.06
Histone	Hp_I03024_IG00319_L791	158	1	1	NO	0	0.51	0.11	2.96	3.22	6.55	3.31	5.72
histone 2A	Hp_I01594_IG00116_L624	84	2	1	NO	0	0	0.33	4.08	0	4.64	0	5.22
HP domain-containing protein	Hp_I08423_IG02296_L1638	159	2	2	NO	0	0	0.11	0	0	0.78	4.58	0
HSP10	Hp_C13291_IG01715_L550	127	1	1	NO	0	0	0.17	3.31	6.55	7.97	7.99	8.67
HSP20	Hp_I30585_IG22529_L470	76	2	2	NO	0	0	0.41	2.42	0	0.88	5.05	3.48
HSP20	Hp_I00695_IG00044_L591	135	2	1	NO	0	0	0.15	0	0	0	5.45	4.79
HSP60	Hp_I12932_IG04876_L2052	74	10	7	NO	0	0.39	0.42	4.26	4.7	5.38	4.97	4.7
HSP70	Hp_I12624_IG04568_L2400	154	4	3	NO	0	0.15	0.12	2.74	2.79	3.51	4.29	4.49
HSP90	Hp_I12705_IG04649_L2285	194	1	1	NO	0	0	0.04	7.62	6.75	6.72	6.38	8.18
Independent phosphoglycerate mutase	Hp_I13238_IG05182_L1840	42	14	12	NO	0	0.05	0.77	5.04	3.49	4.74	3.74	3.85
Inosine-uridine preferring nucleoside hydrolase-like	Hp_I15095_IG07039_L1230	50	7	4	NO	0	0	0.64	0	0	0.82	3.66	0
Kunitz inhibitor	Hp_I38451_IG30395_L390	106	1	1	YES	0	0	0.24	3.75	3.54	5.39	4.08	2.99
Lactate dehydrogenase	Hp_I15767_IG07711_L1120	80	4	4	NO	0	0	0.37	0	0	0	6.49	0
Ladder	Hp_I04570_IG00700_L4683	163	8	6	YES	0.26	0.43	0.11	1.8	6.15	7.29	5.15	0.38
Legumain	Hp_I02849_IG00289_L1962	171	4	2	YES	0.19	0.18	0.09	0	5.86	6.63	6.24	0
LESN-01	Hp_I21617_IG13561_L662	89	2	2	NO	0.31	0	0.31	3.44	2.48	5.84	5.22	3.7
LESP-01	Hp_I30926_IG22870_L465	117	1	1	YES	1.92	0	0.2	0	4.44	5.89	4	0
LESP-02	Hp_I35665_IG27609_L418	114	1	1	YES	0.22	0	0.22	0	0	4.71	0	0.43
LESP-03	Hp_I02965_IG00308_L1259	183	1	1	YES	0.07	0	0.07	6.28	5.33	4.54	2.89	2.65
Leucine aminopeptidase	Hp_I08274_IG02221_L1183	131	3	2	NO	0	0	0.16	0	0	2.45	1.48	0.3
Lipocalin domain containing protein	Hp_I23324_IG15268_L606	45	5	3	NO	0	0.47	0.71	2.27	4.33	5.5	5.4	4.05
Low-density lipoprotein receptor domain class A containing protein	Hp_I13553_IG05497_L1668	160	2	2	NO	0	0	0.11	0	0	0.71	4.96	3.77
Lysozyme-1	Hp_I08665_IG02417_L1321	47	11	5	YES	1.62	4.49	0.67	2.77	6.52	4.99	5.14	0.36
Macrophage migration inhibitory factor	Hp_I26227_IG18171_L535	122	1	1	NO	0	0.58	0.18	3.34	3.2	5.05	3.83	4.71
Malate dehydrogenase	Hp_I15168_IG07112_L1217	180	1	1	NO	0	0.07	0.07	7.55	4.7	5.72	4.57	1.86
Methylmalonyl-CoA epimerase	Hp_I03367_IG00388_L1146	181	1	1	NO	0	0	0.07	6.19	2.33	2.49	4.56	3.6
methylthioadenosine phosphorylase MTAP	Hp_I05544_IG00981_L1191	173	1	1	NO	0	0	0.08	1.83	4.11	3.01	4.67	3.91
MFP2	Hp_I15012_IG06956_L1244	2	47	19	NO	0	1.04	3.8	0	0	0	4.71	0.3
MFP2	Hp_I15256_IG07200_L1205	5	35	16	NO	0	0.7	2.79	0	0	0	4.23	0.3
MFP2	Hp_I15422_IG07366_L1174	12	21	10	NO	0	0.77	1.66	0	0	0.74	4.23	0
MFP2	Hp_I15790_IG07734_L1119	174	1	1	NO	0	0	0.08	0	0	0	5.69	0
MSP-domain containing protein	Hp_I36714_IG28658_L408	4	19	3	NO	0	0.53	2.82	0	0	0	5.47	0
MSP-domain containing protein	Hp_I10419_IG03294_L714	6	31	7	NO	0	1.22	2.3	0	2.46	0.8	10.95	3.51
MSP-domain containing protein	Hp_I40444_IG32388_L371	13	14	2	NO	0	0	1.61	0	0	1.38	4.86	0.79
MSP-domain containing protein	Hp_I41819_IG33763_L358	14	6	4	NO	0	0	1.57	0	0	0	3.29	0
MSP-domain containing protein	Hp_I23616_IG15560_L595	19	10	4	NO	0	0	1.06	2.86	0	0.83	4.77	0.38
MSP-domain containing protein	Hp_I29388_IG21332_L482	22	7	3	NO	0	0	1.05	2.4	0	0	9.36	2.25
MSP-domain containing protein	Hp_I19773_IG11717_L745	27	9	6	NO	0	0	0.95	0	5.08	3.94	5.72	0
MSP-domain containing protein	Hp_I24881_IG16825_L563	33	7	2	NO	0	0.16	0.88	2.9	0	0	4.65	0
MSP-domain containing protein	Hp_I36550_IG28494_L409	60	2	2	NO	0	0	0.52	0	0	0	3.38	0
MSP-domain containing protein	Hp_I18672_IG10616_L814	107	2	2	YES	0	0	0.24	0	0	0	6.47	0.43
MSP-domain containing protein	Hp_I35752_IG27696_L420	110	2	1	NO	0	0.22	0.23	0	0	0	4.32	0
MSP-domain containing protein	Hp_I33850_IG25794_L435	115	1	1	NO	0	0	0.21	0	0	0	7.42	0
MSP-domain containing protein	Hp_I21189_IG13133_L682	146	1	1	NO	0	0	0.13	0	0	0.81	6.87	0
Myoglobin	Hp_I21133_IG13077_L683	51	7	4	YES	3.85	3.49	0.63	0	0	8.59	6.52	0.36
Myoglobin	Hp_I20188_IG12132_L723	75	7	3	YES	2.19	2.02	0.42	0	2.45	9.31	9.03	0
Myoglobin	Hp_I03894_IG00508_L604	87	4	2	YES	0	9.66	0.32	0	2.51	7.65	0	0.9
Myoglobin	Hp_I08959_IG02564_L1212	137	3	2	YES	0.54	0.84	0.15	0	0	7.82	3.32	0.9
Myoglobin	Hp_I03893_IG00508_L677	shared iso	n/a	n/a	YES	1.36	7.08	0	0	2.97	7.72	2.51	1.9
NSN-006	Hp_I24705_IG16649_L569	128	1	1	NO	0	0.35	0.17	0	0	0	5.5	0.92
NSN-102	Hp_I00841_IG00053_L616	83	3	2	NO	1.39	0.99	0.34	2.83	3.48	6.18	3.98	0.89
NSN-103	Hp_I04542_IG00689_L560	99	3	1	NO	0	0.76	0.27	0	0	0	3.4	0
NSP-001	Hp_I22851_IG14795_L620	94	2	2	YES	0	2.55	0.3	0	0	0	5.09	3.57
NSP-002	Hp_I23776_IG15720_L592	62	5	3	YES	0	1.89	0.52	2.28	0	0	5.26	0.38
NSP-003.1	Hp_I22470_IG14414_L621	138	1	1	YES	2.44	2.72	0.15	3.18	7.8	7.88	6.7	0.89
NSP-007	Hp_I24965_IG16909_L566	133	1	1	YES	0	1.01	0.16	0	0	0	6.24	0.38
NSP-009	Hp_I03750_IG00471_L768	164	1	1	YES	0	0.51	0.11	0	0	0	6.27	2.35
NSP-014	Hp_I23615_IG15559_L596	139	1	1	YES	0	1.57	0.15	0	0	0	8.28	4
NSP-019	Hp_I21313_IG13257_L675	150	4	2	YES	0	0.77	0.13	0	0	0	6.57	0.36
NSP-029	Hp_I28140_IG20084_L502	29	8	2	YES	0	0.37	0.92	0	0	0	6.21	0
NSP-030	Hp_I19157_IG11101_L778	18	11	5	YES	0	0.65	1.09	1.92	0	0.79	5.58	5.07
NSP-039	Hp_I35779_IG27723_L416	11	10	3	YES	0	0.75	1.67	0	0	0	7.22	0
Nuclear autoantigenic sperm protein	Hp_I05325_IG00908_L1903	191	2	1	NO	0	0	0.05	2.8	2.37	0.76	4.68	6.02
Nucleoside diphosphate kinase	Hp_I03099_IG00335_L808	20	11	5	NO	0.36	0.63	1.06	3.46	4.84	6.96	4.36	3.56
nucleosome assembly protein 1	Hp_I15133_IG07077_L1218	182	1	1	NO	0	0	0.07	6.24	7.04	6.64	5.46	6.21
PHA02954 domain containing protein	Hp_I09124_IG02646_L958	shared iso	n/a	n/a	YES	0.84	0	0	0	5.02	5.35	4.02	0.32
PHA03247-domain containing protein	Hp_I05226_IG00875_L2602	195	1	1	NO	0	0	0.03	0	0	0	3.22	0
Phosphatidylethanolamine binding protein	Hp_I09383_IG02776_L925	17	12	6	YES	0.21	0.57	1.14	4.44	5.49	6.34	5.76	4.14
Profilin-1	Hp_I23692_IG15636_L593	85	3	1	NO	0	0	0.33	0	0	4.25	2.84	4
Profilin-1	Hp_I18333_IG10277_L834	111	2	1	NO	0	0	0.23	5.04	4.59	5.29	5.31	3.69
proteasome subunit alpha type-5	Hp_I17277_IG09221_L926	166	1	1	NO	0	0	0.1	4.44	3.34	4.46	5.04	7.08
Protein disulfide isomerase	Hp_C02597_IG00028_L1734	170	2	2	YES*	0.22	0.27	0.1	6.03	8.18	10.81	8.77	7.62
Protein disulfide isomerase	Hp_I13312_IG05256_L1794	193	1	1	YES	0.46	0.09	0.05	3.77	7.01	6.11	4.76	7.64
RNA methyltransferase-domain containing protein	Hp_I23849_IG15793_L590	88	2	1	YES	0	0	0.32	0	0	0	4.84	0
ShK domain protein 1	Hp_I28744_IG20688_L490	126	1	1	YES	3.46	0.88	0.18	4.9	3.73	4.2	4.14	0.4
SUMO family member	Hp_C00962_IG00003_L520	78	3	2	NO	0	0	0.39	6.29	3.99	5.31	5.47	9.41
Superoxide dismutase	Hp_I19720_IG11664_L746	147	1	1	NO	0	0	0.13	4.46	0	5.15	5.2	3.22
Superoxide dismutase	Hp_I17015_IG08959_L959	169	1	1	YES	0.1	0.2	0.1	5.26	3.93	5.58	4.45	3.27
Sushi-like	Hp_I09123_IG02646_L960	95	4	3	YES	0.83	1.91	0.3	0	5.18	4.95	5.05	0.41
Sushi-like	Hp_I24007_IG15951_L583	140	1	1	YES	2.59	1.95	0.15	4.45	6.6	7.37	3.47	0
SXC-like 4	GNK0QLK03GQOZO	112	1	1	YES	0.84	0	0.23	9.71	8.69	8.79	4.47	0
Thioredoxin peroxidase	Hp_C00215_IG00001_L710	71	3	2	NO	0.44	2.15	0.44	6.66	6.86	8.29	5.56	8.79
TIL domain containing protein	Hp_I21919_IG13863_L649	46	4	4	YES	0	0	0.69	0	0	0	3.93	2.61
TIL domain containing protein	Hp_I22064_IG14008_L644	68	4	3	YES*	0	0	0.47	2.23	0	0	4.29	0.88
TIL domain containing protein	Hp_I05827_IG01076_L1116	82	4	4	YES*	0	0.15	0.35	0	0	0	2.89	0.38
Translationally controlled tumour protein-like protein	Hp_I09081_IG02625_L1173	72	6	5	NO	0	0	0.44	6.93	6.74	6.31	6.33	7.96
Triose phosphate isomerase	Hp_I15490_IG07434_L1165	70	5	4	NO	0	0.42	0.45	6.04	4.38	5.13	5.77	3.1
Trypsin family protein	Hp_I15710_IG07654_L1132	178	1	1	YES*	0	0.76	0.08	1.84	0	0.74	5.25	0
TTR-01	Hp_I06078_IG01161_L583	57	3	3	YES	0	9.32	0.54	5.93	5.97	6.31	8.69	4.22
TTR-02	Hp_I07157_IG01645_L560	56	3	3	YES	0	6.25	0.56	6.96	2.54	5.12	5.03	1.49
TTR-03	Hp_I07158_IG01645_L560	shared iso	n/a	n/a	YES	0	4.46	0	3.96	3.16	4.33	3.91	0.92
TTR-04	Hp_I10870_IG03519_L443	118	1	1	YES	0	1.43	0.2	0	0	0.9	3.62	3.12
TTR-05	Hp_I26601_IG18545_L528	9	10	5	YES	0	2.03	1.73	2.96	2.56	6.62	4.94	0.94
tubulin alpha chain	Hp_I00415_IG00033_L1681	161	2	1	NO	0	0	0.11	0	3.31	3.73	3.3	6.15
tubulin beta chain	Hp_I04784_IG00759_L1542	186	1	1	NO	0	0	0.06	2.83	4.31	4.95	1.3	0.4
VAL-01 FRAGMENT variant	GSXTT4C07IB13H	41	5	1	YES*	0.48	2.06	0.79	0	2.65	0	0	0
VAL-01 FRAGMENT variant	Hp_I02288_IG00202_L430	shared iso	n/a	n/a	YES*	0.23	0	0	0	3.43	2.57	1.44	0
VAL-01 FRAGMENT variant	GNK0QLK03HBAHW	shared iso	n/a	n/a	YES*	0	1.75	0	2.59	0	0	0	0
VAL-01.1	Hp_I13898_IG05842_L1539	30	17	9	YES	0	6.11	0.92	0	2.43	3.96	10.3	0.28
VAL-01.2	Hpb-VAL-1.2	64	15	7	YES*	1.27	4.44	0.51	0	0	3.84	7.78	0
VAL-01.3	Hp_I04202_IG00583_L1521	63	8	6	YES	2.12	2.68	0.52	3.67	8.27	10.44	3.67	3.11
VAL-01.4	Hp_I08791_IG02480_L1486	151	3	2	YES	0.62	1.36	0.13	0	0	0.79	4.33	0
VAL-01.5 FRAGMENT	Hp_I22486_IG14430_L629	43	7	4	YES*	1.59	5.93	0.72	0	3.46	2.94	3.15	0
VAL-01.6 FRAGMENT	FL8UM6J01DXUGS	28	2	1	YES*	2.77	2.58	0.94	0	0	0	2.37	0
VAL-01.7 FRAGMENT	Hp_I17933_IG09877_L867	49	11	4	YES*	1.45	1.13	0.65	0	3.86	0.77	2.86	0
VAL-01.8	Hp_I02283_IG00202_L1498	shared iso	n/a	n/a	YES	0.44	0.26	0	0	5.67	4.99	1.93	0
VAL-01.9	Hp_I14033_IG05977_L1489	shared iso	n/a	n/a	YES	0	0.06	0	0	2.44	4.85	3.25	0.28
VAL-02.1	Hp_I07953_IG02060_L1482	shared iso	n/a	n/a	YES	0	6.94	0	0	0	1.38	6.83	0
VAL-02.2	Hp_I15068_IG07012_L1238	15	20	10	YES*	0	20.48	1.55	0	0	0	5.22	2.53
VAL-02.3	Hpb-VAL-2.3	67	19	9	YES	0.35	2.43	0.47	0	0	3.93	9.02	0
VAL-03.1	Hpb-VAL-3	58	9	7	YES	1.2	8.39	0.53	0	4.35	5.55	7.83	0
VAL-03.2 (C-terminal)	Hp_I48980_IG40924_L272	shared iso	n/a	n/a	YES*	0	6.89	0	2.93	0	0	3.55	0
VAL-03.2 (N-terminal)	Hp_I19215_IG11159_L774	shared iso	n/a	n/a	YES*	0	0.51	0	2.62	0	2.7	5.01	0.34
VAL-04	Hpb-VAL-4	145	1	1	YES	0.3	5.3	0.14	3.2	6.43	8.57	8.86	0.32
VAL-05	Hpb-VAL-5	189	1	1	YES	0.2	0.87	0.06	0	0	1.35	4.81	0.77
VAL-07.1	Hpb-VAL7.1	24	8	6	YES	7.29	13.49	1.02	0	7.05	7.62	6.75	0
VAL-07.2	Hp_I01453_IG00104_L978	38	10	6	YES*	1.39	6.69	0.83	0	3.73	4.29	6.34	0
VAL-07.3	Hpb-VAL-7.3	25	10	6	YES	5.55	19.24	1.02	6.67	8.86	7.56	4.51	0.32
VAL-07.4	Hp_I01449_IG00104_L991	shared iso	n/a	n/a	YES	6	9.16	0	7.03	10.14	8.73	5.23	0.32
VAL-07.5	Hp_I01454_IG00104_L794	35	10	6	YES	0	9.87	0.88	0	2.79	4.2	5.25	0.7
VAL-09	Hp_I14221_IG06165_L1437	103	5	4	YES	1.04	1.6	0.27	0	0	0.72	7.57	0
VAL-12	Hpb-VAL-12	184	1	1	YES	0.57	1.08	0.07	1.82	2.91	6.92	7.77	0.3
Vitellogenin	Hp_I01061_IG00070_L5128	23	55	37	YES	0	2.98	1.04	0	0	0.66	6.7	0.23
Vitellogenin	Hp_I01065_IG00070_L5127	26	54	36	YES	0	0	0.97	0	0	0	6.52	0
Vitellogenin	Hp_I12337_IG04281_L4997	59	36	21	YES	0	1.81	0.53	0	2.18	0.69	12.82	0.25
Vitellogenin	Hp_I01069_IG00070_L5129	shared iso	n/a	n/a	YES	0	2.78	0	0	0	0.66	6.13	0.23
Vitellogenin	Hp_I01085_IG00070_L5126	shared iso	n/a	n/a	YES	0	2.74	0	0	0	0	5.95	0
