# Supplementary material for: Secretion of Protective Antigens by Tissue-Stage Nematode Larvae Revealed by Proteomic Analysis and Vaccination-Induced Sterile Immunity
Source: PLoS Pathog. 2013 Aug 15;9(8):e1003492. doi: 10.1371/journal.ppat.1003492 (PMC3744408; doi:10.1371/journal.ppat.1003492)
Supplement: Table S5 — Enrichment of Pfam domains in different ES preparations. Pfam domains present in ES proteins ranked by statistical significance compared to their frequency in the H. polygyrus transcriptome assembly. (XLSX) [file ppat.1003492.s011.xlsx]

## Sheet: Table S5 = pfam enrichment
L4 ES	PFID	Name	Isotigs with domain	pValue		HES	PFID	Name	Isotigs with domain	pValue		ERM	PFID	Name	Isotigs with domain	pValue
1	PF00084	Sushi	24	2.231e-23		1	PF00188	CAP	28	6.1e-17		1	PF00635	Motile_Sperm	13	4.132e-12
2	PF00188	CAP	21	5.993e-15		2	PF00084	Sushi	16	1.77e-09		2	PF00188	CAP	13	2.67e-07
3	PF00042	Globin	9	2.803e-10		3	PF01400	Astacin	15	1.436e-08		3	PF12150	MFP2b	4	1.693e-06
4	PF01549	ShK	7	6.138e-05		4	PF01060	DUF290	13	7.605e-08		4	PF00042	Globin	5	6.416e-05
5	PF00135	COesterase	3	0.0042		5	PF00042	Globin	8	4.998e-07		5	PF00274	Glycolytic	2	0.001017
6	PF00112	Peptidase_C1	3	0.009295		6	PF00274	Glycolytic	3	3.388e-05		6	PF00080	Sod_Cu	2	0.001017
7	PF06394	Pepsin-I3	1	0.01907		7	PF00026	Asp	6	4.974e-05		7	PF00235	Profilin	2	0.001017
8	PF06079	Apyrase	2	0.01975		8	PF01579	DUF19	4	6.7e-05		8	PF06079	Apyrase	3	0.001187
9	PF13848	Thioredoxin_6	2	0.0229		9	PF06079	Apyrase	4	0.0004158		9	PF01826	TIL	3	0.002805
10	PF00160	Pro_isomerase	2	0.03327		10	PF00337	Gal-bind_lectin	5	0.0004231		10	PF00056	Ldh_1_N	2	0.003266
11	PF00113	Enolase_C	1	0.03743		11	PF12150	MFP2b	3	0.0006143		11	PF02866	Ldh_1_C	2	0.003266
12	PF03952	Enolase_N	1	0.03743		12	PF05823	Gp-FAR-1	3	0.00104		12	PF00135	COesterase	3	0.003938
13	PF01400	Astacin	4	0.04218		13	PF00079	Serpin	3	0.001611		13	PF02798	GST_N	2	0.01339
14	PF00274	Glycolytic	1	0.05507		14	PF05577	Peptidase_S28	3	0.004303		14	PF00166	Cpn10	1	0.01863
15	PF00080	Sod_Cu	1	0.05507		15	PF01549	ShK	6	0.006077		15	PF01676	Metalloenzyme	1	0.01863
16	PF00069	Pkinase	1	0.06138		16	PF01607	CBM_14	2	0.009515		16	PF06415	iPGM_N	1	0.01863
17	PF00034	Cytochrom_C	1	0.07203		17	PF00135	COesterase	3	0.01692		17	PF00199	Catalase	1	0.01863
18	PF00334	NDK	1	0.08833		18	PF00092	VWA	3	0.01692		18	PF06628	Catalase-rel	1	0.01863
19	PF07966	A1_Propeptide	1	0.08833		19	PF09172	DUF1943	4	0.0173		19	PF01597	GCV_H	1	0.01863
20	PF03265	DNase_II	1	0.08833		20	PF01130	CD36	2	0.01871		20	PF09172	DUF1943	3	0.01993
21	PF00085	Thioredoxin	2	0.09228		21	PF01347	Vitellogenin_N	4	0.01898		21	PF01347	Vitellogenin_N	3	0.02145
22	PF01161	PBP	1	0.104		22	PF00094	VWD	4	0.01898		22	PF00094	VWD	3	0.02145
23	PF01484	Col_cuticle_N	2	0.1058		23	PF02520	DUF148	4	0.02258		23	PF00125	Histone	3	0.02145
24	PF00031	Cystatin	1	0.119		24	PF00450	Peptidase_S10	2	0.02414		24	PF13848	Thioredoxin_6	2	0.02195
25	PF05823	Gp-FAR-1	1	0.119		25	PF01431	Peptidase_M13	3	0.02801		25	PF01060	DUF290	4	0.02342
26	PF02520	DUF148	2	0.1192		26	PF01650	Peptidase_C13	2	0.03004		26	PF03351	DOMON	2	0.02513
27	PF00014	Kunitz_BPTI	2	0.1323		27	PF05649	Peptidase_M13_N	3	0.03117		27	PF00043	GST_C	2	0.03193
28	PF01650	Peptidase_C13	1	0.1473		28	PF13918	PLDc_3	1	0.03244		28	PF00160	Pro_isomerase	2	0.03193
29	PF02798	GST_N	1	0.1605		29	PF01676	Metalloenzyme	1	0.03244		29	PF10415	FumaraseC_C	1	0.03657
30	PF01391	Collagen	2	0.1616		30	PF06415	iPGM_N	1	0.03244		30	PF00113	Enolase_C	1	0.03657
31	PF01060	DUF290	2	0.2202		31	PF00182	Glyco_hydro_19	1	0.03244		31	PF03952	Enolase_N	1	0.03657
32	PF00043	GST_C	1	0.2289		32	PF00923	Transaldolase	1	0.03244		32	PF00044	Gp_dh_N	1	0.03657
33	PF00022	Actin	1	0.2566		33	PF02221	E1_DerP2_DerF2	1	0.03244		33	PF00670	AdoHcyase_NAD	1	0.03657
34	PF01431	Peptidase_M13	1	0.2805		34	PF00210	Ferritin	1	0.03244		34	PF05221	AdoHcyase	1	0.03657
35	PF00026	Asp	1	0.2805		35	PF02798	GST_N	2	0.03634		35	PF00838	TCTP	1	0.03657
36	PF05649	Peptidase_M13_N	1	0.2876		36	PF00635	Motile_Sperm	4	0.05582		36	PF01156	IU_nuc_hydro	1	0.03657
						37	PF00085	Thioredoxin	3	0.05681		37	PF00956	NAP	1	0.03657
						38	PF13848	Thioredoxin_6	2	0.05708		38	PF00121	TIM	1	0.03657
						39	PF01074	Glyco_hydro_38	1	0.06279		39	PF03953	Tubulin_C	2	0.0509
						40	PF09261	Alpha-mann_mid	1	0.06279		40	PF10516	SHNi-TPR	1	0.05383
						41	PF10415	FumaraseC_C	1	0.06279		41	PF02800	Gp_dh_C	1	0.05383
						42	PF01120	Alpha_L_fucos	1	0.06279		42	PF01063	Aminotran_4	1	0.05383
						43	PF00113	Enolase_C	1	0.06279		43	PF00313	CSD	1	0.05383
						44	PF03952	Enolase_N	1	0.06279		44	PF00217	ATP-gua_Ptrans	1	0.05383
						45	PF06653	Claudin_3	1	0.06279		45	PF02807	ATP-gua_PtransN	1	0.05383
						46	PF00769	ERM	1	0.06279		46	PF00061	Lipocalin	1	0.05383
						47	PF14008	Metallophos_C	1	0.06279		47	PF01187	MIF	1	0.05383
						48	PF01630	Glyco_hydro_56	1	0.06279		48	PF00091	Tubulin	2	0.05908
						49	PF00121	TIM	1	0.06279		49	PF00034	Cytochrom_C	1	0.07045
						50	PF03351	DOMON	2	0.06444		50	PF02852	Pyr_redox_dim	1	0.07045
						51	PF00043	GST_C	2	0.07957		51	PF00206	Lyase_1	1	0.07045
						52	PF00160	Pro_isomerase	2	0.07957		52	PF00883	Peptidase_M17	1	0.07045
						53	PF07748	Glyco_hydro_38C	1	0.09114		53	PF00011	HSP20	2	0.0804
						54	PF02806	Alpha-amylase_C	1	0.09114		54	PF00334	NDK	1	0.08643
						55	PF02878	PGM_PMM_I	1	0.09114		55	PF01048	PNP_UDP_1	1	0.08643
						56	PF02879	PGM_PMM_II	1	0.09114		56	PF00349	Hexokinase_1	1	0.08643
						57	PF02880	PGM_PMM_III	1	0.09114		57	PF03727	Hexokinase_2	1	0.08643
						58	PF00217	ATP-gua_Ptrans	1	0.09114		58	PF01607	CBM_14	1	0.08643
						59	PF02807	ATP-gua_PtransN	1	0.09114		59	PF07966	A1_Propeptide	1	0.08643
						60	PF00080	Sod_Cu	1	0.09114		60	PF00191	Annexin	1	0.08643
						61	PF00061	Lipocalin	1	0.09114		61	PF03265	DNase_II	1	0.08643
						62	PF01187	MIF	1	0.09114		62	PF00085	Thioredoxin	2	0.08914
						63	PF00014	Kunitz_BPTI	3	0.09518		63	PF13669	Glyoxalase_4	1	0.1018
						64	PF00022	Actin	2	0.1027		64	PF04421	Mss4	1	0.1018
						65	PF00034	Cytochrom_C	1	0.1176		65	PF01161	PBP	1	0.1018
						66	PF00206	Lyase_1	1	0.1176		66	PF13589	HATPase_c_3	1	0.1018
						67	PF09380	FERM_C	1	0.1176		67	PF00795	CN_hydrolase	1	0.1018
						68	PF04777	Evr1_Alr	1	0.1176		68	PF00059	Lectin_C	3	0.1079
						69	PF00128	Alpha-amylase	1	0.1176		69	PF00031	Cystatin	1	0.1165
						70	PF00408	PGM_PMM_IV	1	0.1176		70	PF00241	Cofilin_ADF	1	0.1165
						71	PF09412	XendoU	1	0.1176		71	PF10712	NAD-GH	1	0.1165
						72	PF05497	Destabilase	1	0.1176		72	PF00012	HSP70	1	0.1165
						73	PF00112	Peptidase_C1	2	0.1407		73	PF00183	HSP90	1	0.1165
						74	PF01020	Ribosomal_L40e	1	0.1422		74	PF10584	Proteasome_A_N	1	0.1307
						75	PF00334	NDK	1	0.1422		75	PF01650	Peptidase_C13	1	0.1443
						76	PF00349	Hexokinase_1	1	0.1422		76	PF07992	Pyr_redox_2	1	0.1574
						77	PF03727	Hexokinase_2	1	0.1422		77	PF00300	His_Phos_1	1	0.1819
						78	PF00561	Abhydrolase_1	1	0.1422		78	PF03143	GTP_EFTU_D3	1	0.1934
						79	PF04083	Abhydro_lipase	1	0.1422		79	PF00155	Aminotran_1_2	1	0.1934
						80	PF00056	Ldh_1_N	1	0.1422		80	PF00227	Proteasome	1	0.1934
						81	PF02866	Ldh_1_C	1	0.1422		81	PF00057	Ldl_recept_a	1	0.2045
						82	PF00191	Annexin	1	0.1422		82	PF03144	GTP_EFTU_D2	1	0.2439
						83	PF03265	DNase_II	1	0.1422		83	PF00118	Cpn60_TCP1	1	0.269
						84	PF01161	PBP	1	0.1651		84	PF00337	Gal-bind_lectin	1	0.269
						85	PF09379	FERM_N	1	0.1651		85	PF00026	Asp	1	0.2765
						86	PF12661	hEGF	1	0.1651		86	PF00112	Peptidase_C1	1	0.2906
						87	PF01733	Nucleoside_tran	1	0.1651		87	PF00009	GTP_EFTU	1	0.3291
						88	PF00031	Cystatin	1	0.1864		88	PF00084	Sushi	1	0.3462
						89	PF11838	ERAP1_C	1	0.1864		89	PF02520	DUF148	1	0.348
						90	PF00241	Cofilin_ADF	1	0.1864		90	PF00089	Trypsin	1	0.351
						91	PF10712	NAD-GH	1	0.1864		91	PF00106	adh_short	1	0.3563
						92	PF00012	HSP70	1	0.1864		92	PF01549	ShK	1	0.3722
						93	PF01055	Glyco_hydro_31	1	0.1864
						94	PF00009	GTP_EFTU	2	0.1883
						95	PF00125	Histone	2	0.2059
						96	PF10584	Proteasome_A_N	1	0.2062
						97	PF02170	PAZ	1	0.2062
						98	PF00059	Lectin_C	1	0.2201
						99	PF00089	Trypsin	2	0.2214
						100	PF03764	EFG_IV	1	0.2244
						101	PF00326	Peptidase_S9	1	0.2244
						102	PF02171	Piwi	1	0.2568
						103	PF00679	EFG_C	1	0.2711
						104	PF00373	FERM_M	1	0.2711
						105	PF00227	Proteasome	1	0.2842
						106	PF03143	GTP_EFTU_D3	1	0.2842
						107	PF00155	Aminotran_1_2	1	0.2842
						108	PF00240	ubiquitin	1	0.3168
						109	PF01826	TIL	1	0.3168
						110	PF01764	Lipase_3	1	0.3168
						111	PF03144	GTP_EFTU_D2	1	0.3337
						112	PF00328	His_Phos_2	1	0.3408
						113	PF13499	EF-hand_7	1	0.3461
						114	PF00118	Cpn60_TCP1	1	0.3527
						115	PF00149	Metallophos	1	0.356
